# Supplementary material for: Generation of Marker-Free pbd-2 Knock-in Pigs Using the CRISPR/Cas9 and Cre/loxP Systems
Source: MDPI journal article supplement (doi:10.3390/genes11080951), 2020-08-18
Supplement: s1 [file s1]

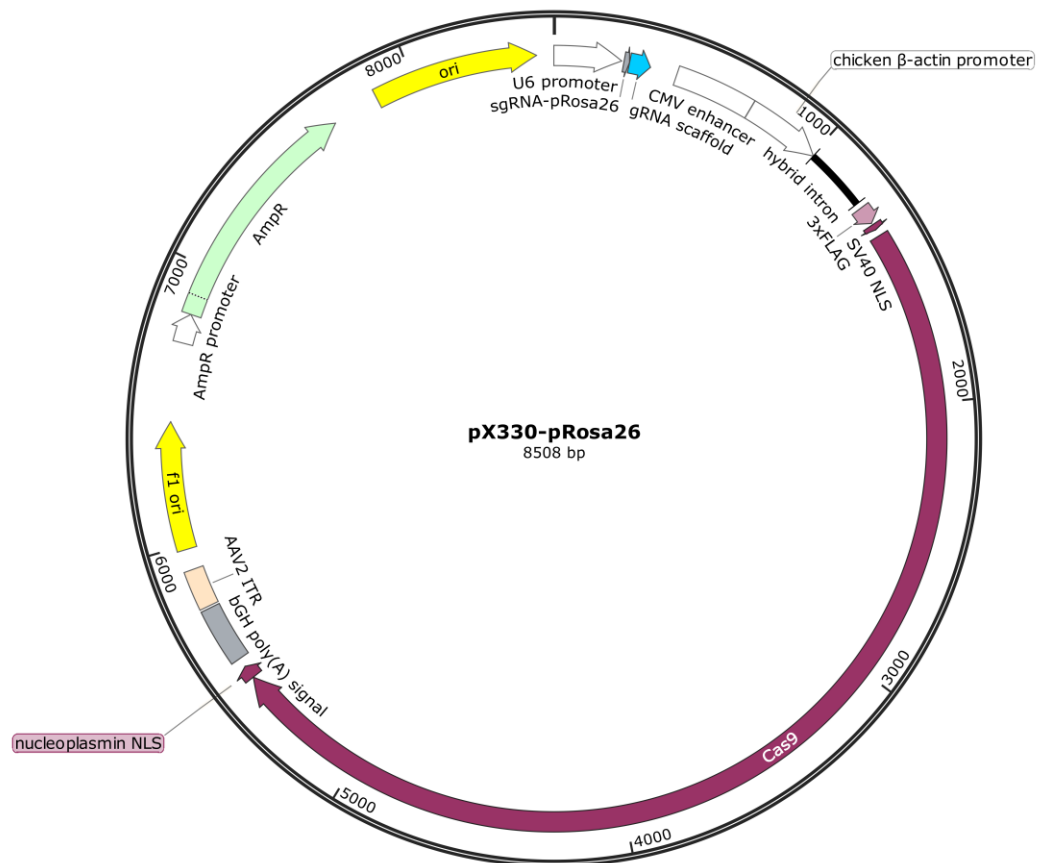

**Figure S2.** Map of *pX330-pRosa26*. A plasmid expressing Cas9 nuclease and sgRNA targeting the *pRosa26* locus (5'-GCTCCTTCTCGATTATGGGC-3').

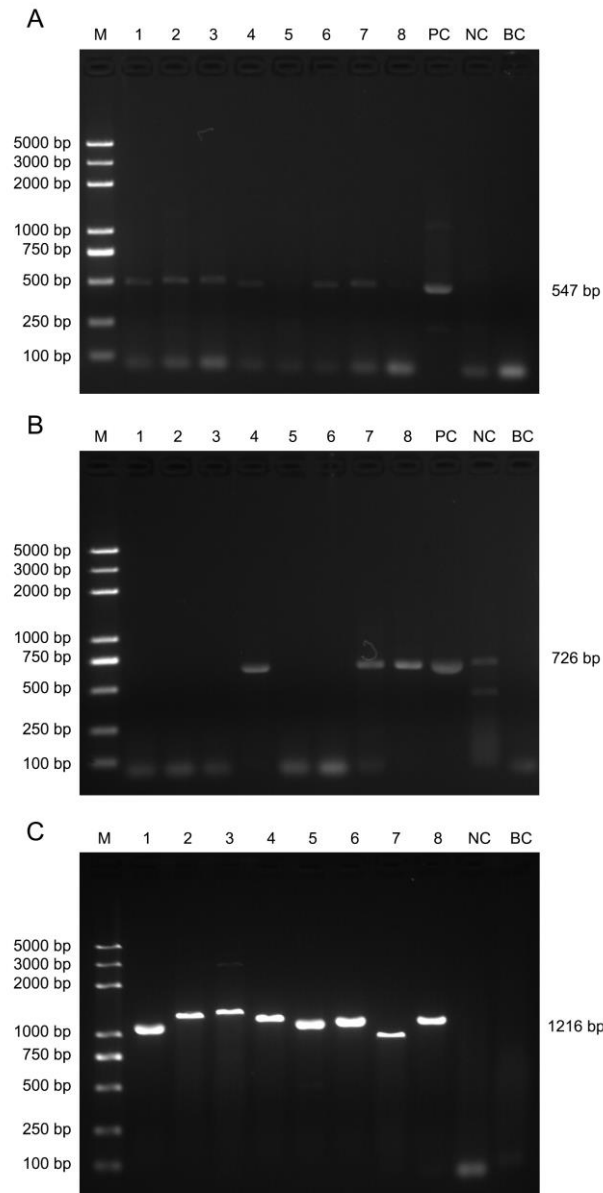

**Figure S3.** PCR analysis for the identification of site-specific *pbd-2* knock-in porcine fetal fibroblasts (PFFs). (A) Amplification for the dual *pbd-2* gene; (B) Amplification for the selectable marker gene *neoR*; (C) Amplification for the fragment which represents on-target insertion of the transgene. M: Molecular mass marker; Lane 1-8: Numbers for different cell colonies; PC: Positive control; NC: Negative control; BC: Blank control.

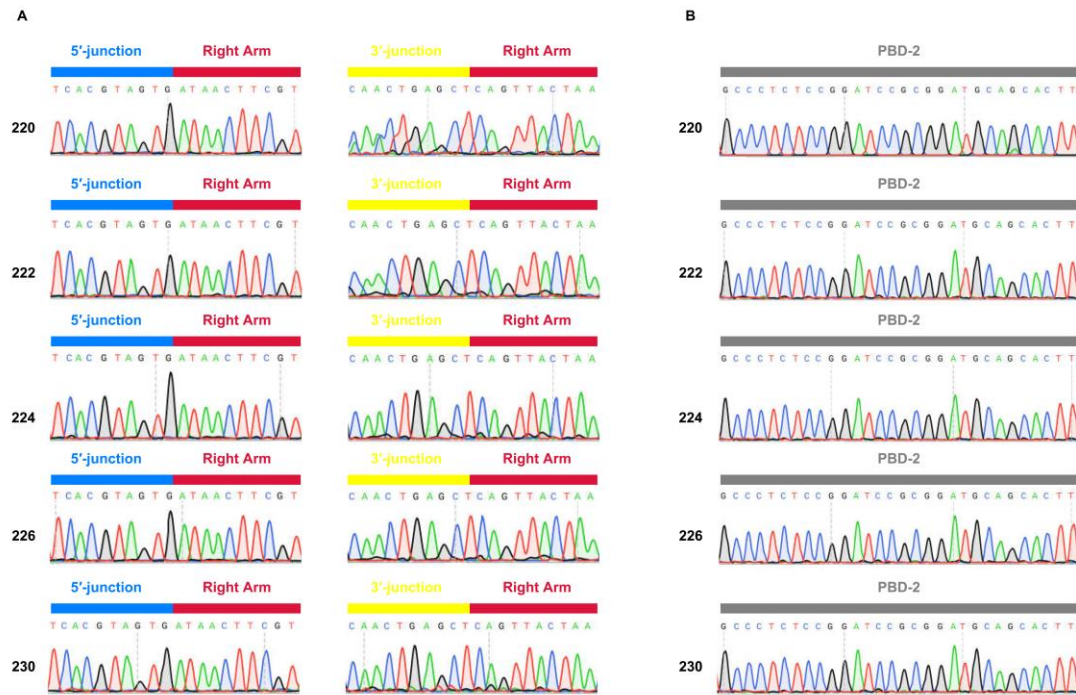

**Figure S4.** Sanger sequencing analyses to confirm on-target integration of *pbd-2* in cloned pigs. Numbers represent different transgenic pigs. **(A)** Sequencing results of the On-target fragment amplified with primers OT-F and OT-R. Red line indicates the sequence in the right homology arm; blue line indicates the sequence upstream of the right homology arm; yellow line indicates the sequence downstream of the right homology arm. **(B)** Sequencing results of the PBD-2 fragment amplified with primers vTG-F and vTG-R. Gray line indicates the sequence in the *pbd-2* gene.

**Table S1.** Information of primer pairs for identification of transgenic PFFs.

| Fragment | Primer   | Sequence (5'-3')           | Length (bp) |
|----------|----------|----------------------------|-------------|
| PBD-2    | vTG-F    | GCTGGTTGTTGTGCTGTCTCATCA   | 547         |
|          | vTG-R    | CCCTCTAGACTCGAGTCAGGGTCAGC |             |
| Marker   | marker-F | GATGGATTGCACGCAGGTTCTCC    | 726         |
|          | marker-R | GATACCGTAAAGCACGAGGAAGCG   |             |
| Locus    | f-locus  | CCTTCTATCGCCTTCTTGACGAGTT  | 1216        |
|          | r-locus  | AACTGTCCCAGCAACACCTAAGATT  |             |

**Table S2.** Information of primer pairs for amplification of predicted off-target loci.

| Fragment | Primer | Sequence (5'-3')          | Length (bp) |
|----------|--------|---------------------------|-------------|
| OT-1     | OT1-F  | ATAAAACAATGGGGGAATGAGAC   | 429         |
|          | OT1-R  | AGCCAGAGGCAAAGTGATAGATA   |             |
| OT-2     | OT2-F  | CACAGAAGGAATCCCTGAGAGA    | 389         |
|          | OT2-R  | CATGCTTCTCTGCACACACTA     |             |
| OT-3     | OT3-F  | TCGGTGTCTTGCCAAGTCG       | 417         |
|          | OT3-R  | CACCTTCCTGGCATTAAATCCCT   |             |
| OT-4     | OT4-F  | AGTTAATGATTCCTAGGACATGCTT | 367         |
|          | OT4-R  | TCAAAGTGGCGGGTAAGGGAA     |             |
| OT-5     | OT5-F  | GGGTCTGTGTTGTTGCATGAGAA   | 350         |
|          | OT5-R  | CACAGTGGGTGAGGTAAGAAATT   |             |
